# Supplementary material
Source: PubMed Central journal article supplement (PMC4677916)
Supplement: supp_pp.15.01391_PP2015-01391_Supplemental_Material.pdf [file supp_pp.15.01391_PP2015-01391_Supplemental_Material.pdf]

**SUPPLEMENTAL TABLE:****Table S1. Primer sequences**

| <b>Primer Name</b>     | <b>Sequence 5' to 3'</b>             |
|------------------------|--------------------------------------|
| Primer F1 (PBL13)      | ATGGTTTTGTGTTTCCAAGATC               |
| Truncation RV          | GTAATCTTTGATGTCTTGGAGAACGG           |
| GABI RV                | AAGACTTGTCTCTTTAACTTCC               |
| SALK RV                | CCATCAAGATCAAGAAGTTTAACG             |
| pbl13 SALK_203557 RP   | GTGACCATGGATGTAATTTGCGGTTC           |
| pbl13 SALK_203557 LP   | CTACCTCAAGAAGTCGTCGTCCTC             |
| LbB1.3                 | ATTTTGCCGATTTCCGAAC                  |
| At5g35580 GABI LP      | CTCCAGCTGTTAGAGACGTCG                |
| At5g35580 GABI RP      | CAAGGCGATGATACACATGTG                |
| GABi_TDNA_o8409        | ATATTGACCATCATACTCATTGC              |
| At5g35580CACCF         | CACCATGGTTTTGTGTTTCCA                |
| At5g35580 -stop R      | GTACCGTTCCCCTCCGGCCTCGTT             |
| PBL13 K111A F          | CTCAGCCCCTTGCCGTTGCTCTTCTTGATCTTGATG |
| PBL13 K111A R          | CATCAAGATCAAGAAGAGCAACGGCAACGGGCTGAG |
| EF-1a_F                | CTGGATTTCGAGGGAGACAACATG             |
| EF-1a_R                | GCACCGTTCCAATACCACCAATC              |
| PR1 qF                 | CGGAGCTACGCAGAACAAC                  |
| PR1 qR                 | CTCGCTAACCCACATGTTC                  |
| BamHI PBL13 FW         | GGATCCATGGTTTTGTGTTTCCAAGATCC        |
| PBL13 XhoI RV          | CTCGAGTCAGTACCGTTCCCCTCCG            |
| NdeI RIPK-F            | GTTACGCATATGGCGGTGAAGAAG             |
| BamHI RIPK-R with stop | AGGATCCTTAGTACCGTTCCCAC              |

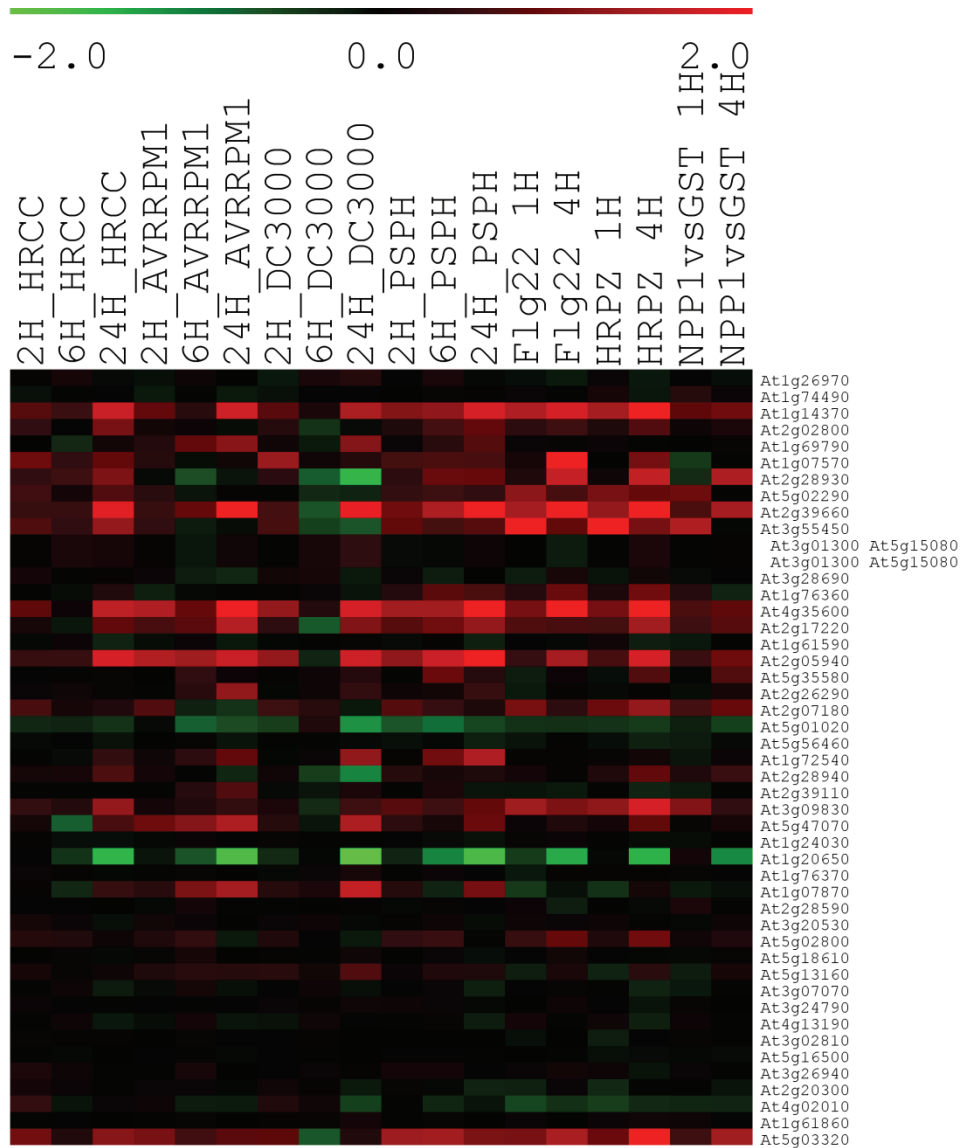

**Figure S1. RLCK VIIs expression in response to biotic stresses**

Analysis of AtGenExpress Biotic Stress data reveals several RLCK VII members are transcriptionally regulated in response to treatment with pathogens or elicitors. Pathogen treatments include avirulent *Pto* DC3000 *hrcC*-, avirulent *Pto* DC3000 (*AvrRpm1*), and the non-host pathogen *Pseudomonas syringae* pv. *phaseolicola*. Elicitor treatments include the bacterial PAMP flg22, the bacterial elicitor HrpZ, and the oomycete elicitor NPP1. Heat map displays the log<sub>2</sub> transformed ratio of treatment to control samples. Twenty four genes were found to be at least 1.5 fold up-regulated in one or more conditions. Seven genes were found to be at least 1.5 fold down-regulated in one or more conditions.

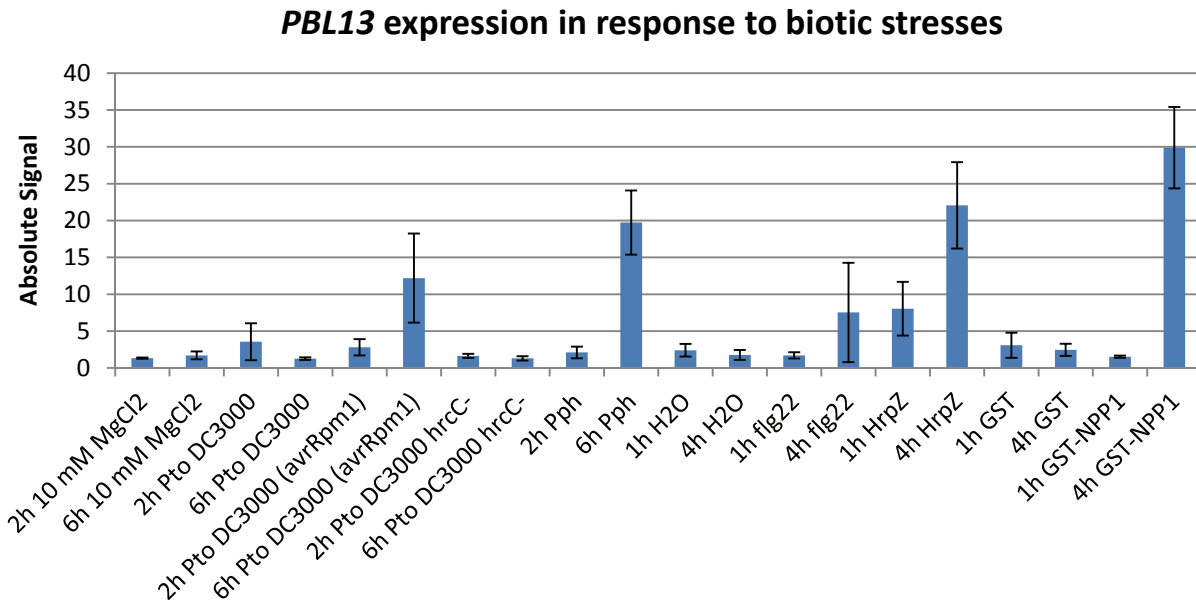

**Figure S2. *PBL13* is differentially regulated in response to biotic stresses**

*PBL13* expression data obtained from the Arabidopsis eFP Browser (Winter et al., 2007). Five-week-old Col-0 plants were syringe infiltrated with bacterial pathogens resuspended in 10 mM MgCl<sub>2</sub> or elicitors resuspended in water. *PBL13* is upregulated in response to treatment with avirulent *Pto* DC3000 (AvrRpm1), the non-host pathogen *P. syringae* pv. *phaseolicola*, the bacterial derived elicitor HrpZ, and the oomycete derived elicitor NPP1. Measurement indicates absolute quantification of the signal.

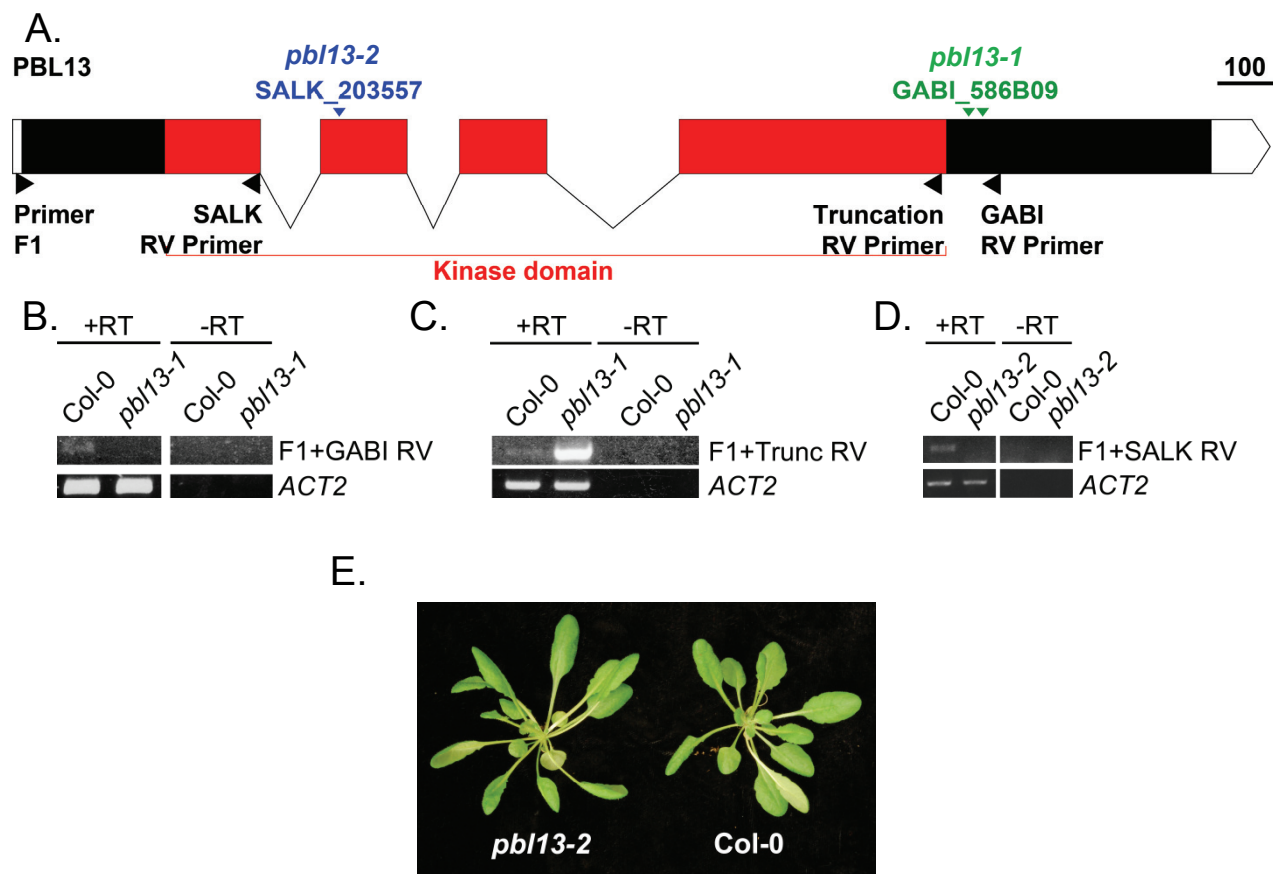

**Figure S3. *pbl13-2* is a true knockout and is morphologically similar to wild type Col-0**

A, Diagram of T-DNA insertions within *PBL13* and location of primer binding sites. GABI\_586B09 has two tandem inverted T-DNA insertions immediately downstream of the kinase coding region. The kinase domain is indicated in red. B, The GABI\_586B09 T-DNA insertion line *pbl13-1* does not express full length *PBL13*. RT = reverse transcriptase, *ACT2* = *ACTIN 2* (*AT3G18780*). C, The GABI\_586B09 T-DNA insertion line *pbl13-1* expresses a truncated form of *PBL13*. The expression of truncated *PBL13* is higher than wild type *PBL13* in Col-0. D, The SALK\_203577 T-DNA insertion line *pbl13-2* is a true knockout. The *PBL13* transcript upstream of the T-DNA insertion cannot be detected. E, *pbl13-2* does not exhibit gross morphological differences from wild type Col-0.

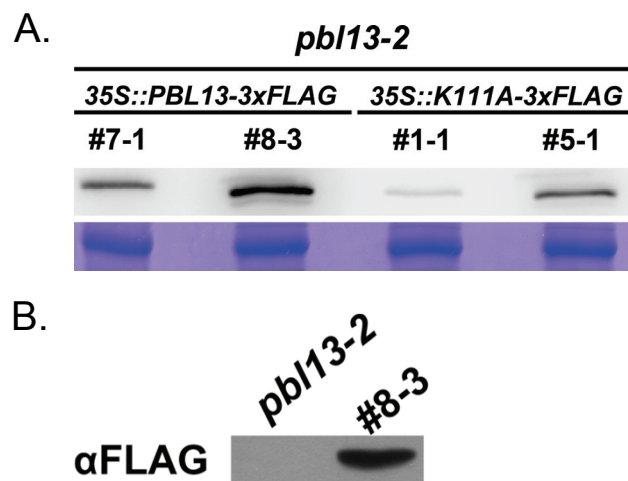

**Figure S4. PBL13-3xFLAG expression in transgenic lines**  
 A, Detection of the PBL13-3xFLAG transgene expression in individual T3 complementation lines. Ten micrograms of protein were loaded per lane. Equal protein loading was determined by coomassie staining. PBL13 was detected by anti-FLAG immunoblotting. B,  $\alpha$ FLAG-HRP (Sigma) does not detect cross reacting bands in the *pbl13-2* background.

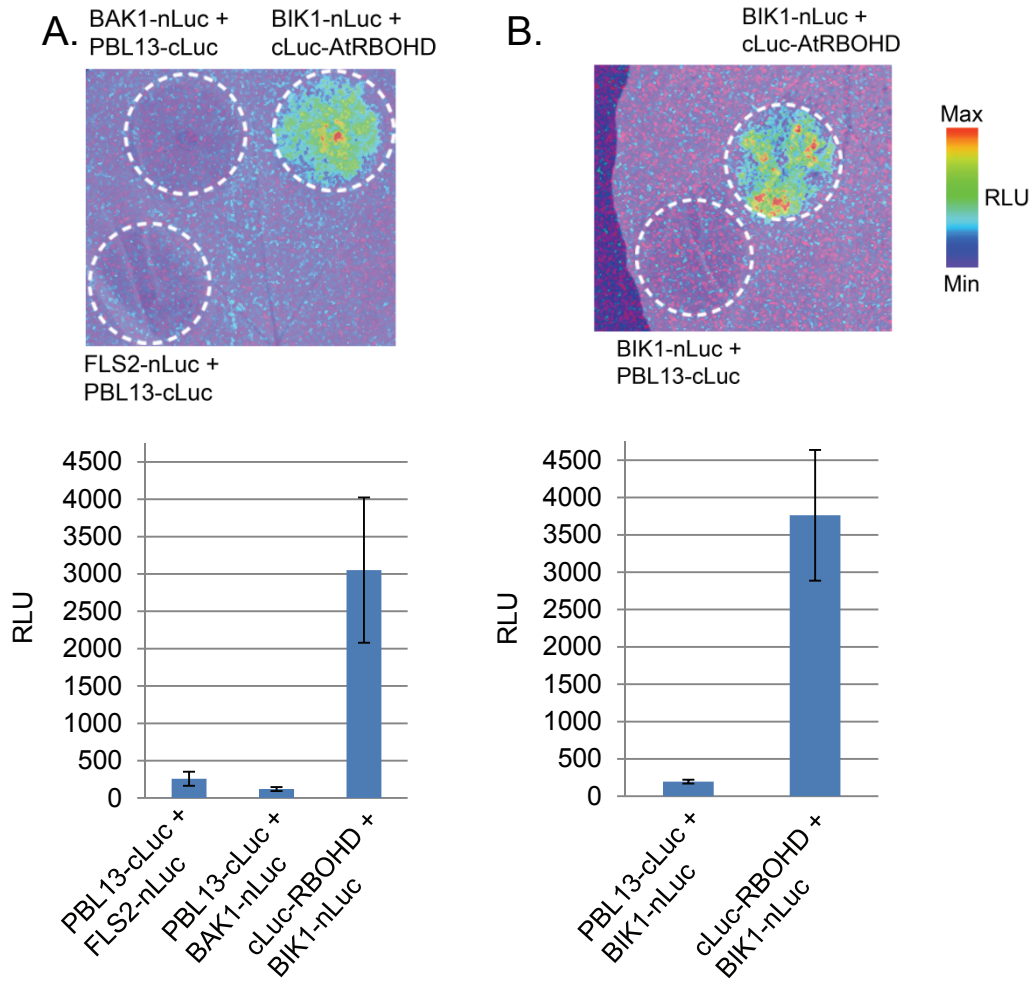

**Figure S5. PBL13 does not associate with FLS2, BAK1, or BIK1 by split-luciferase complementation imaging.**

PBL13 fails to associate with members of the FLS2 complex in *N. benthamiana*. BIK1 association with RBOHD is used here as a positive control. Constructs were transiently expressed in *N. benthamiana* and luminescence was detected after treatment with 1 mM luminol solution. A, visualization of luminescence with a CCD camera. B, quantification of luminescence using a luminometer. Error bars indicate standard deviation.

A.

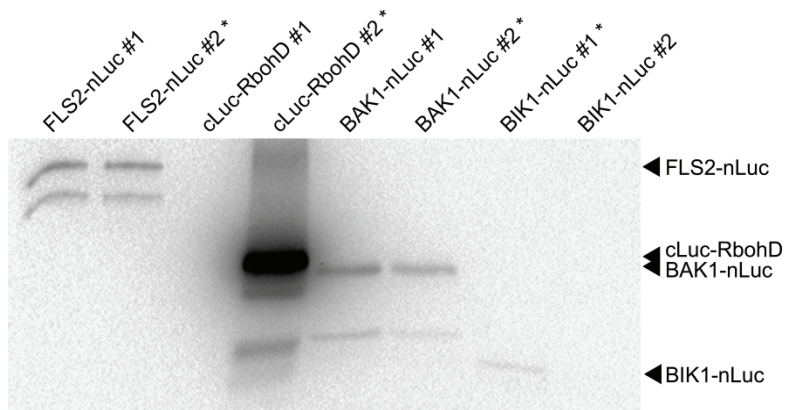

B.

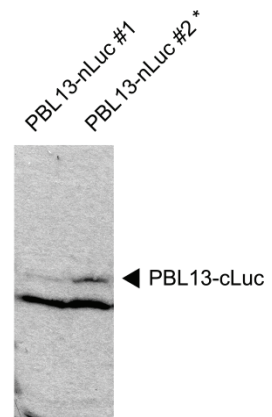

**Figure S6. Luciferase-fusion proteins express in *Nicotiana benthamiana***

A, B, Detection of luciferase-fusion proteins after transient coexpression in *Nicotiana benthamiana*. Asterisks denote *Agrobacterium* clones used in this study. Proteins were detected with anti-luciferase primary antibody (Sigma) and goat anti-rabbit-HRP secondary (BioRad).
